# Supplementary material
Source: MDPI journal article supplement (https://www.mdpi.com/search?q=molecules-24-01576)
Supplement: s001 [file molecules-24-01576-s001.pdf]

The pharmacokinetic parameters of GL-V9 in rats (n=6, mean  $\pm$  SD)

| Parameter       | Units   | oral administration<br>(50 mg/kg) |
|-----------------|---------|-----------------------------------|
| $T_{1/2}$       | h       | $3.08 \pm 1.05$                   |
| $T_{max}$       | h       | 0.31–0.77                         |
| $C_{max}$       | ng/mL   | $167.33 \pm 50.05$                |
| $AUC_{(0-t)}$   | h*ng/mL | $1212.06 \pm 246.47$              |
| $AUC_{(0-inf)}$ | h*ng/mL | $1256.04 \pm 271.82$              |
| $V_d$           | L/kg    | $181.06 \pm 63.57$                |
| $MRT_{0-t}$     | h       | $7.70 \pm 0.91$                   |
| CL              | L/h/kg  | $41.38 \pm 8.84$                  |
| F               | -       | 8.54%                             |

\* These data cited from the Xing et al. [38].
